# Supplementary material for: A proteome-integrated, carbon source dependent genetic regulatory network in Saccharomyces cerevisiae
Source: Royal Society of Chemistry journal article supplement (doi:10.1039/c9mo00136k), 2019-12-23
Supplement: c9mo00136k1.pdf [file c9mo00136k1.pdf]

A0 – Yeast growth curves under different nutrient conditions

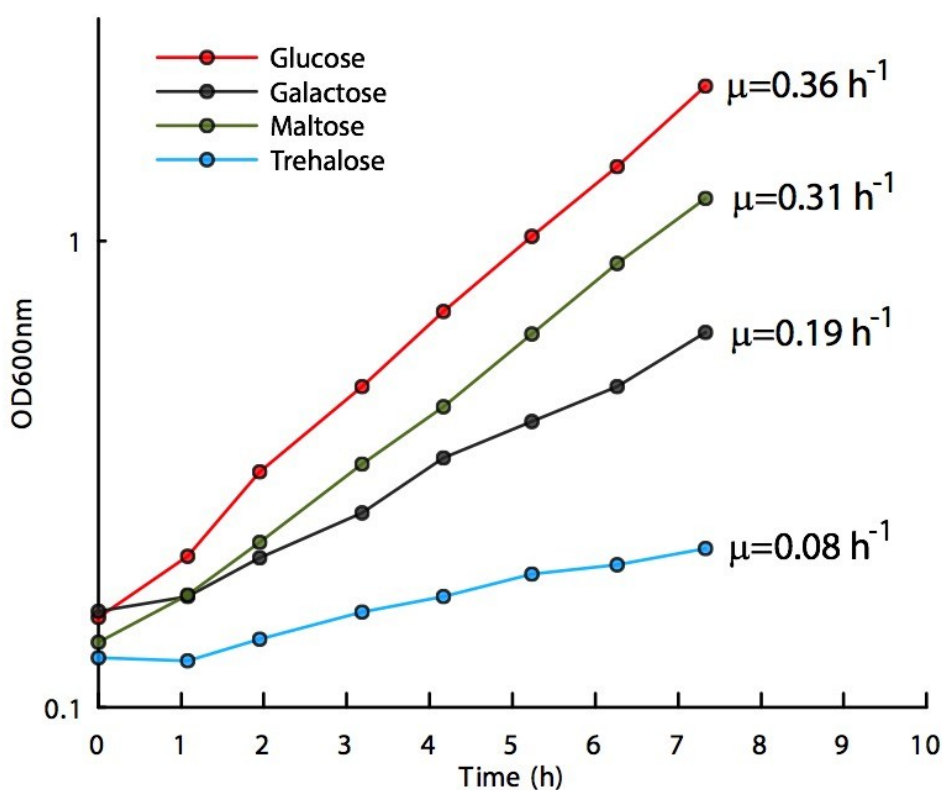

*Saccharomyces cerevisiae* strain CEN.PK113-7D (Genotype: *MATα URA3 HIS3 LEU2 TRP1 MAL2-8c SUC2*) [34-37] was grown on minimal (Verduyn) medium with two monosaccharides (glucose and galactose) and two disaccharides (maltose and trehalose) as carbon sources in batch cultures with four biological replicates. Samples were grown at 30°C, 200 rpm shaking in shake flasks, 2% (w/v) carbon source and sampling at OD<sub>600</sub> = 1. The medium was buffered with 100 mM phthalic acid/KOH at pH 5.0. Samples were taken at mid-exponential phase.
